# Supplementary material for: Sepsis Prediction Model for Determining Sepsis vs SIRS, qSOFA, and SOFA
Source: PubMed Central journal article supplement (PMC10457723; doi:10.1001/jamanetworkopen.2023.29729), 2023-08-25
Supplement: jamanetwopen-e2329729-s002.pdf [file jamanetwopen-e2329729-s002.pdf]

## Data Sharing Statement

Schertz. Sepsis Prediction Model for Determining Sepsis vs SIRS, qSOFA, and SOFA. *JAMA Netw Open*. Published August 18, 2023. doi:10.1001/jamanetworkopen.2023.29729

### Data

**Data available:** No

### Additional Information

**Explanation for why data not available:** Data are available upon request with appropriate approvals.
